# Supplementary material
Source: bioRxiv or medRxiv preprint supplement (https://www.biorxiv.org/highwire/filestream/125230/field_highwire_adjunct_files/0/404913-1.pdf)
Supplement: Supplementary file [file 404913-1.pdf]

905 **SUPPLEMENTARY FIGURES**

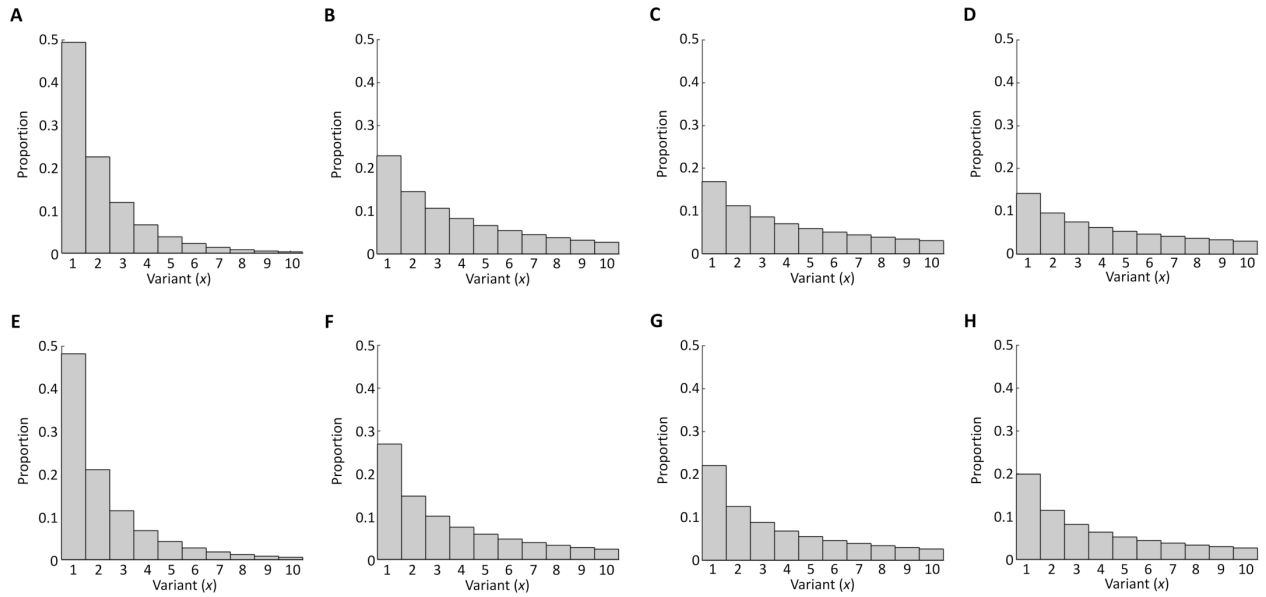

906

907 Figure S1. The distributions of variants in donors throughout their course of infection parameterised using  
 908 data from p24 and nef. The best model fit is shown for p24 after: (A) 1 year; (B) 4 years; (C) 7 years; (D)  
 909 10 years. The best model fit is shown for nef after: (E) 1 year; (F) 4 years; (G) 7 years; (H) 10 years. The  
 910 x-axis represents the  $x^{\text{th}}$  most common variant at the time of sampling. The best fitting models and  
 911 parameter values are given in Table 1 of Text S1.

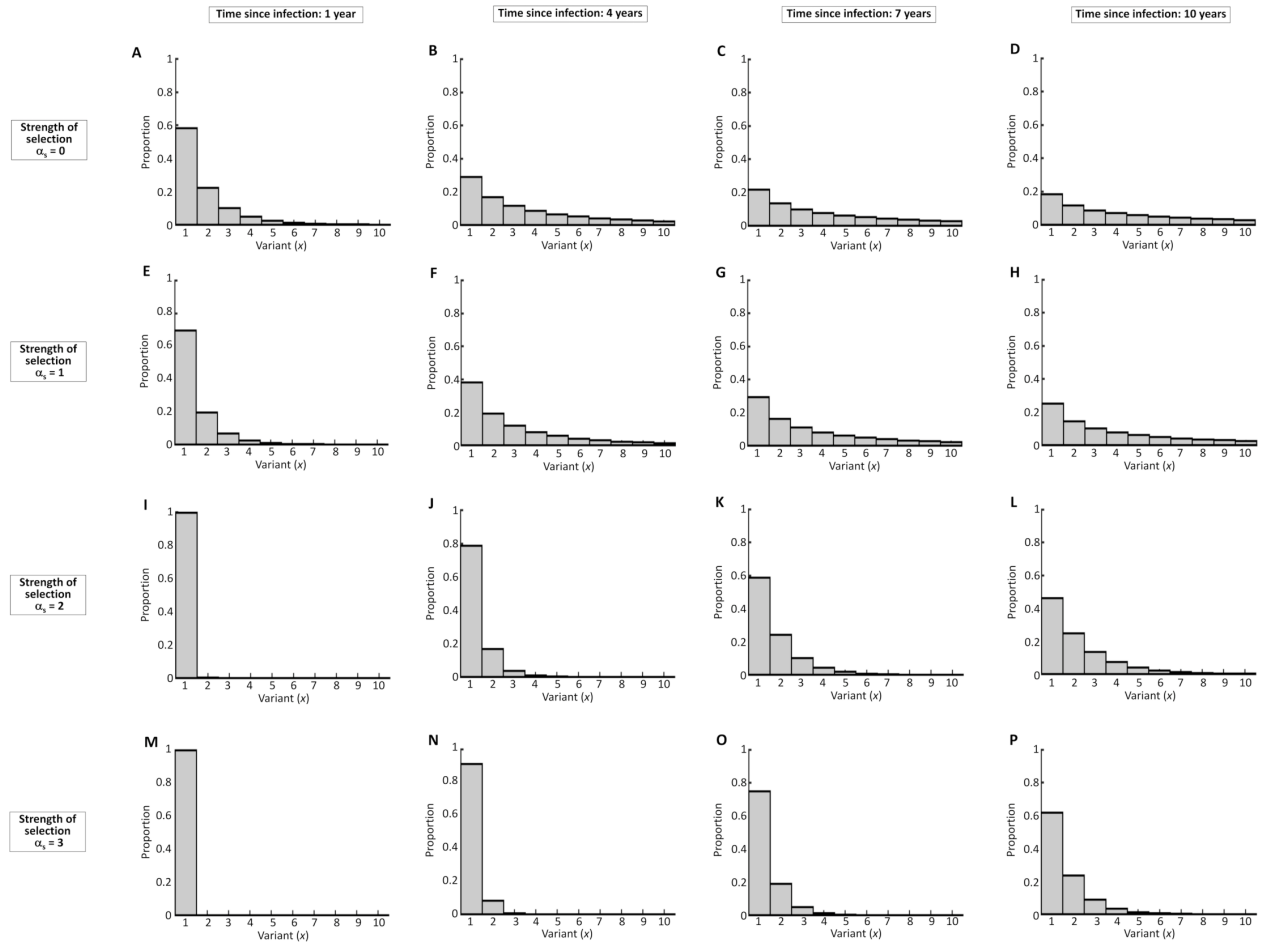

912

913 Figure S2. The distribution of variants throughout infection, for different assumed strengths of selection  
 914 ( $\alpha_s$ ), using data from integrase. The best model fit is shown after 1, 4, 7 and 10 years for (A)-(D):  $\alpha_s = 0$ ;  
 915 (E)-(H):  $\alpha_s = 1$ ; (I)-(L):  $\alpha_s = 2$ ; (M)-(P):  $\alpha_s = 3$ . The  $x$ -axis represents the  $x^{\text{th}}$  most common variant at the  
 916 time of sampling after adjusting for selection (see Materials and Methods). The best fitting models and  
 917 parameter values are given in Table 1 of Text S1.

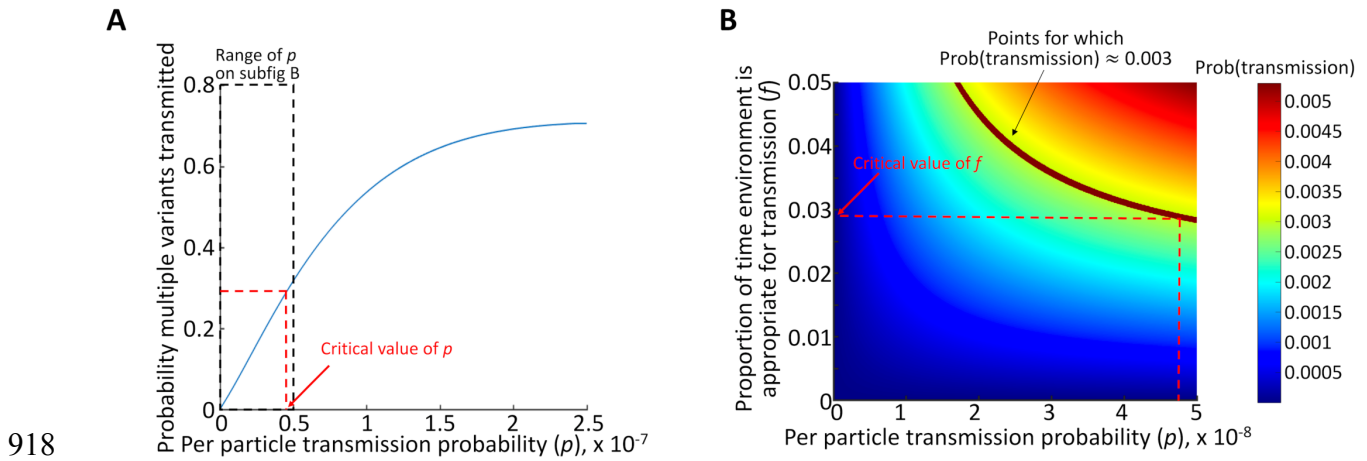

918

919 Figure S3. Parameterising the model. (A) The value of the per-act transmission probability ( $p$ ) is chosen so  
 920 that the probability of transmitting multiple variants in a single act conditional on transmission is 0.3; (B)  
 921 The value of the proportion of the time the environment in the recipient is appropriate for transmission ( $f$ ) is  
 922 then chosen so that the probability of transmission per act is 0.003 at the value of  $p$  selected in panel A.  
 923 Here this process gives the values  $p = 4.715 \times 10^{-8}$  and  $f = 0.029$ . The case shown here is for no selection  
 924 at transmission and no bias towards early infection. Where such a pair exists, there is always a unique pair  
 925 of values  $p$  and  $f$  corresponding to  $\text{Prob}(\text{multi-variant transmission}) = 0.3$  and  $\text{Prob}(\text{transmission}) = 0.003$ .

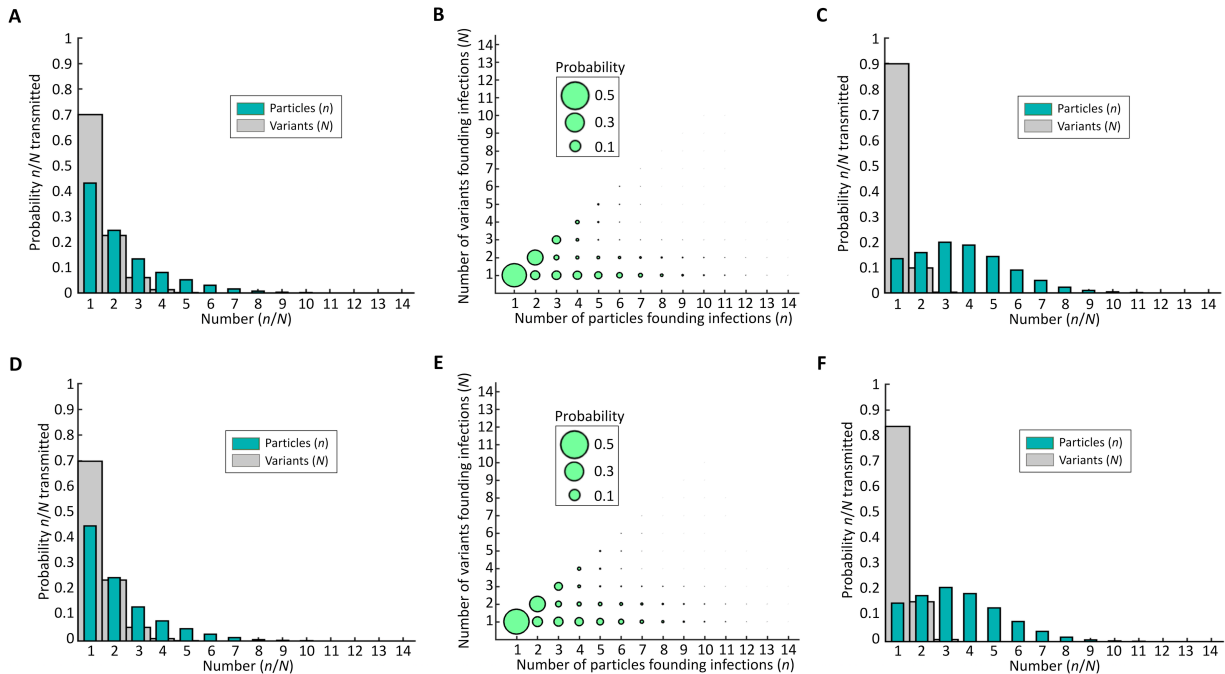

926

927 Figure S4. The qualitative results of our analyses are unchanged when our model is parameterised using  
 928 sequencing data from other regions of the viral genome. (A) The distributions of the numbers of particles  
 929 (teal) and numbers of distinct variants (grey) founding new infections in the population when the model is  
 930 parameterised using sequencing data from p24. (B) The joint distribution of the numbers of particles and  
 931 variants founding new infections when the model is parameterised using sequencing data from p24. The  
 932 circle areas are proportional to the probabilities that they represent. (C) The distributions of the numbers of  
 933 particles (teal) and numbers of distinct variants (grey) founding new infections in the population, from donors  
 934 in early infection only (infected for less than two years), when the model is parameterised using sequencing  
 935 data from p24. (D)-(F) Same as A-C but using sequencing data from nef. Parameter values: variant  
 936 distribution parameter values are given in Table 1 of Text S1, and transmission parameter values are given  
 937 in Table 2 of Text S1.

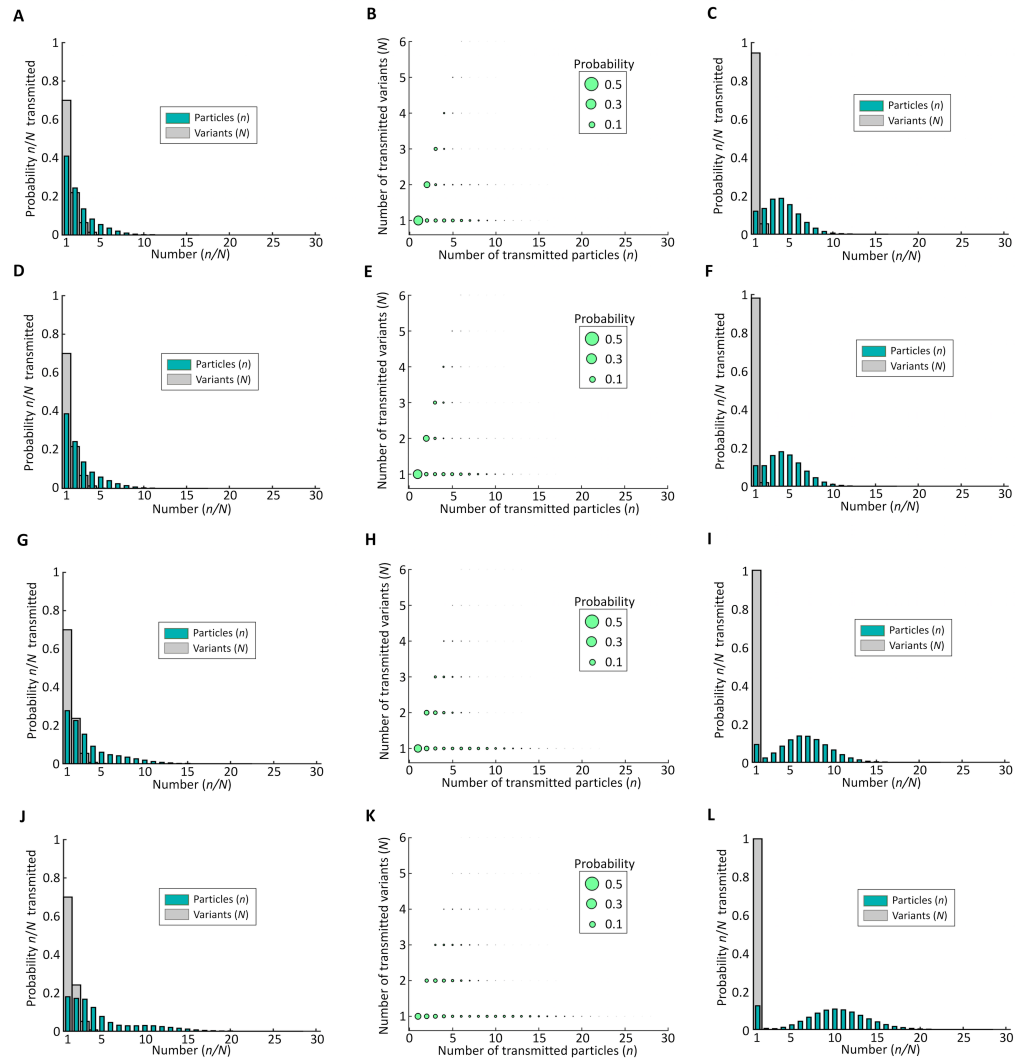

938

939 Figure S5. The impact of selection on the numbers of particles and viral variants that found new infections  
 940 in the population. (A) The distributions of the numbers of particles (teal) and numbers of distinct variants  
 941 (grey) founding new infections in the population with no selection ( $\alpha_s = 0$ ). (B) The joint distribution of the  
 942 numbers of particles and variants founding new infections with no selection ( $\alpha_s = 0$ ). Circle areas are  
 943 proportional to the probabilities that they represent. (C) The distributions of the numbers of particles (teal)  
 944 and numbers of distinct variants (grey) founding new infections in the population, from donors in early  
 945 infection only (infected for less than two years), with no selection ( $\alpha_s = 0$ ). Panels D-F are the analogous  
 946 results to A-C but with weak selection ( $\alpha_s = 1$ ). Panels G-I are the analogous results to A-C but with strong  
 947 selection ( $\alpha_s = 2$ ). Panels J-L are the analogous results to A-C but with very strong selection ( $\alpha_s = 3$ ).

948 Parameter values: variant distribution parameter values are given in Table 1 of Text S1, and transmission  
949 parameter values are given in Table 2 of Text S1.

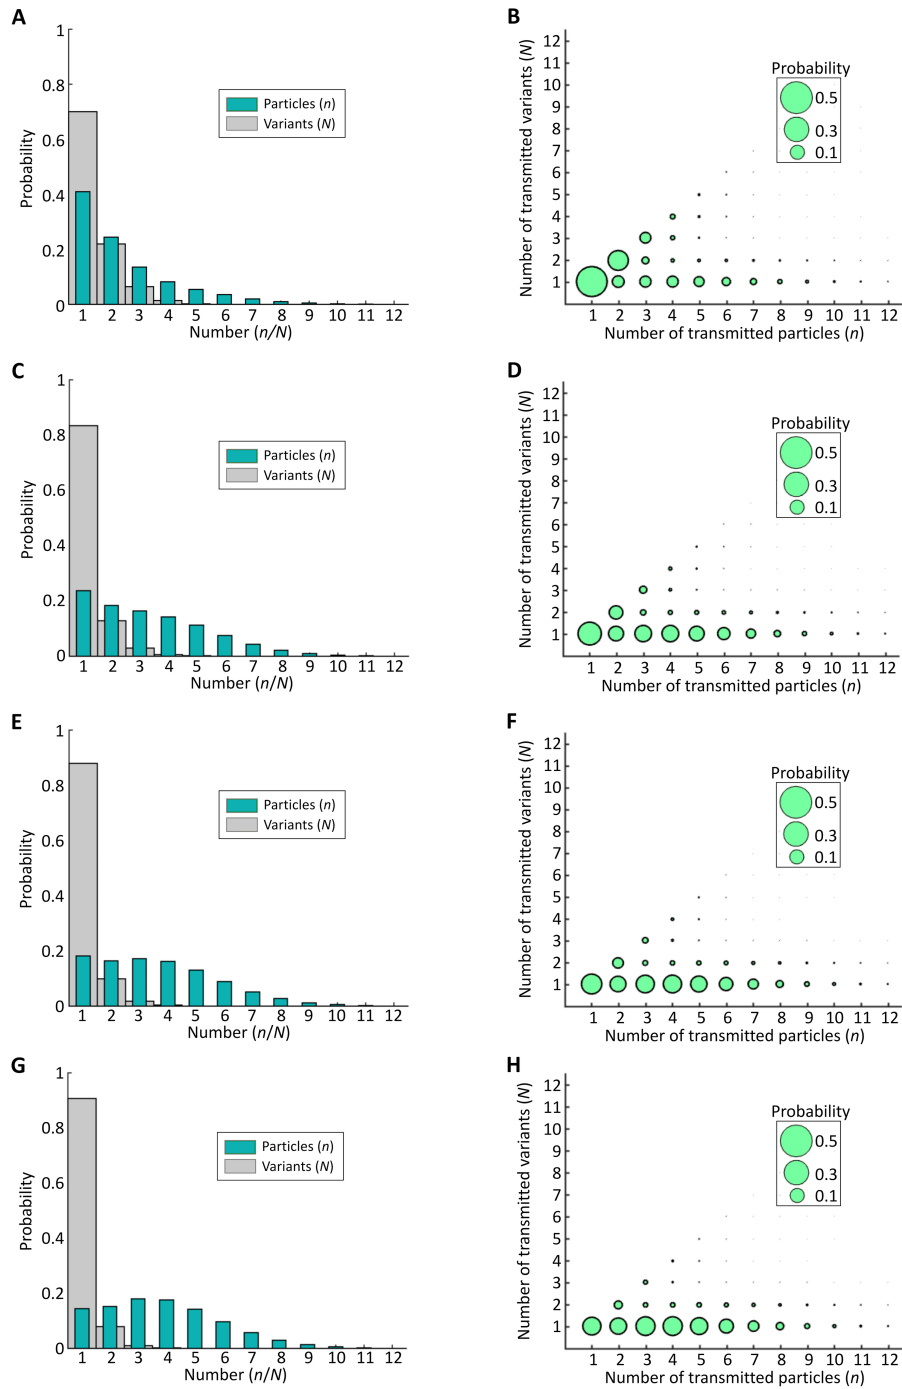

950

951 Figure S6. The distributions of the numbers of transmitted particles and variants when transmission is  
 952 weighted towards early infection. Left column: The distributions of the numbers of particles (teal) and  
 953 numbers of distinct variants (grey) founding new infections in the population. Right column: The joint  
 954 distribution of the numbers of particles and variants founding new infections. (A) and (B) No weighting

955 towards early infection ( $w = 1$ ). (C) and (D) Moderate weighting towards infections founded by donor in  
956 early infection ( $w = 5$ ). (E) and (F) Strong weighting ( $w = 10$ ). (G) and (H) Very strong weighting ( $w = 20$ ).  
957 Parameter values: variant distribution parameter values are given in Table 1 of Text S1, and transmission  
958 parameter values are given in Table 2 of Text S1.



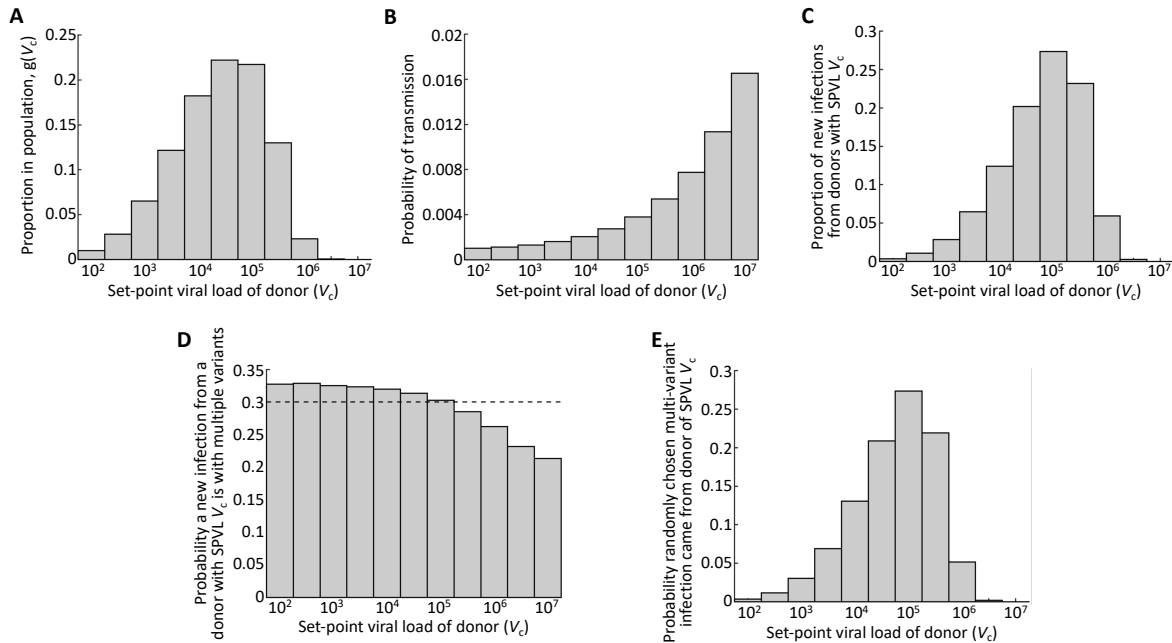

959

960 Figure S7. Determining which transmissions arise from individuals with different SPVLs. (A) The  
 961 proportion of donors with each SPVL in the population. (B) The probability that a randomly chosen  
 962 potential transmission act leads to transmission. (C) The proportion of new infections in a population  
 963 arising from donors with each SPVL, evaluated as the normalised product of A and B. (D) Conditional on  
 964 transmission, the probability that a new infection from a donor is with multiple variants. The dotted line  
 965 represents the population average value. (E) The probability, for a randomly chosen new multi-variant  
 966 infection in the population, that it arose from an individual with each set-point viral load, evaluated as the  
 967 normalised product of C and D. Parameter values: variant distribution parameter values are given in  
 968 Table 1 of Text S1, and transmission parameter values are given in Table 2 of Text S1.  
 969

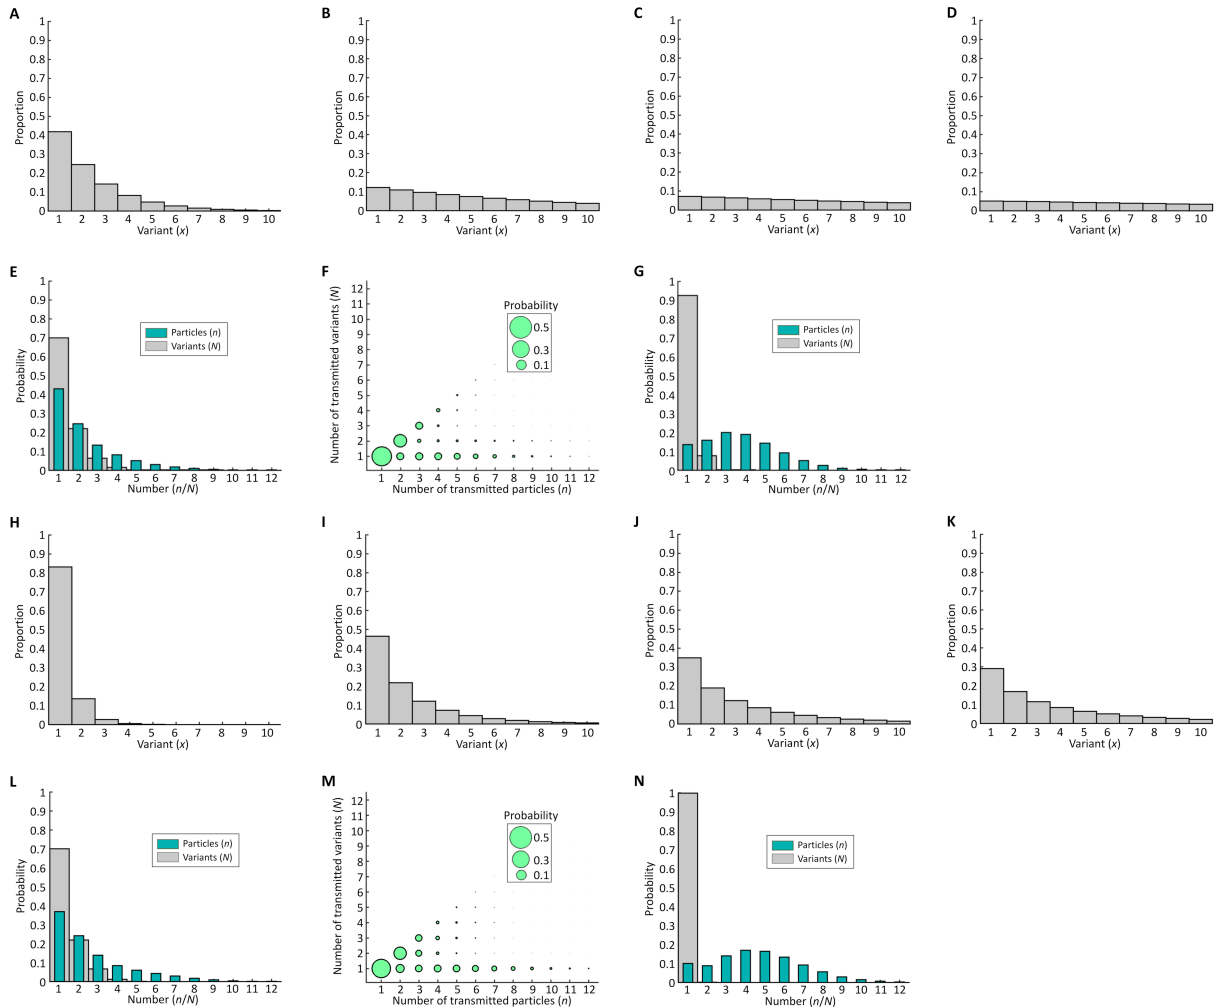

970

971 Figure S8. The distributions of the numbers of transmitted particles and variants for different variant  
 972 diversity distributions within donors. Panels (A)-(D) show the distribution of variants in donors with high  
 973 variant diversity who have been infected for 1 year, 4 years, 7 years and 10 years, respectively. The x-  
 974 axis, representing the  $x^{\text{th}}$  most common variant, is truncated after the tenth most common variant, but the  
 975 full distribution is used in our model. (E) The distributions of the numbers of particles (teal) and numbers  
 976 of distinct variants (grey) founding new infections in the population from donors with high variant diversity.  
 977 (F) The joint distribution of the numbers of particles and variants founding new infections from donors with  
 978 high variant diversity. (G) The distributions of the numbers of particles (teal) and numbers of distinct  
 979 variants (grey) founding new infections in the population, from donors in early infection only (infected for  
 980 less than two years), from donors with high variant diversity. Panels H-K are analogous to A-D but for

981 donors with low variant diversity, and panels L-N are analogous to E-G but for donors with low variant  
982 diversity. To consider donors with different variant diversity, the parameters of the gamma distribution  
983 characterising variant diversity in the no selection and no bias towards early infection case (Table 1 of  
984 Text S1) are multiplied by appropriate factors. For high diversity the parameter  $\delta$  is multiplied by factor 2.5  
985 (so that  $\delta = 1.043$ ), and for low diversity the parameter  $\eta$  is multiplied by factor 2.5 (so that  $\eta = 1.41$ ). The  
986 transmission parameter values are then reparameterised to fit the population-level data (see Table 2 of  
987 Text S1).

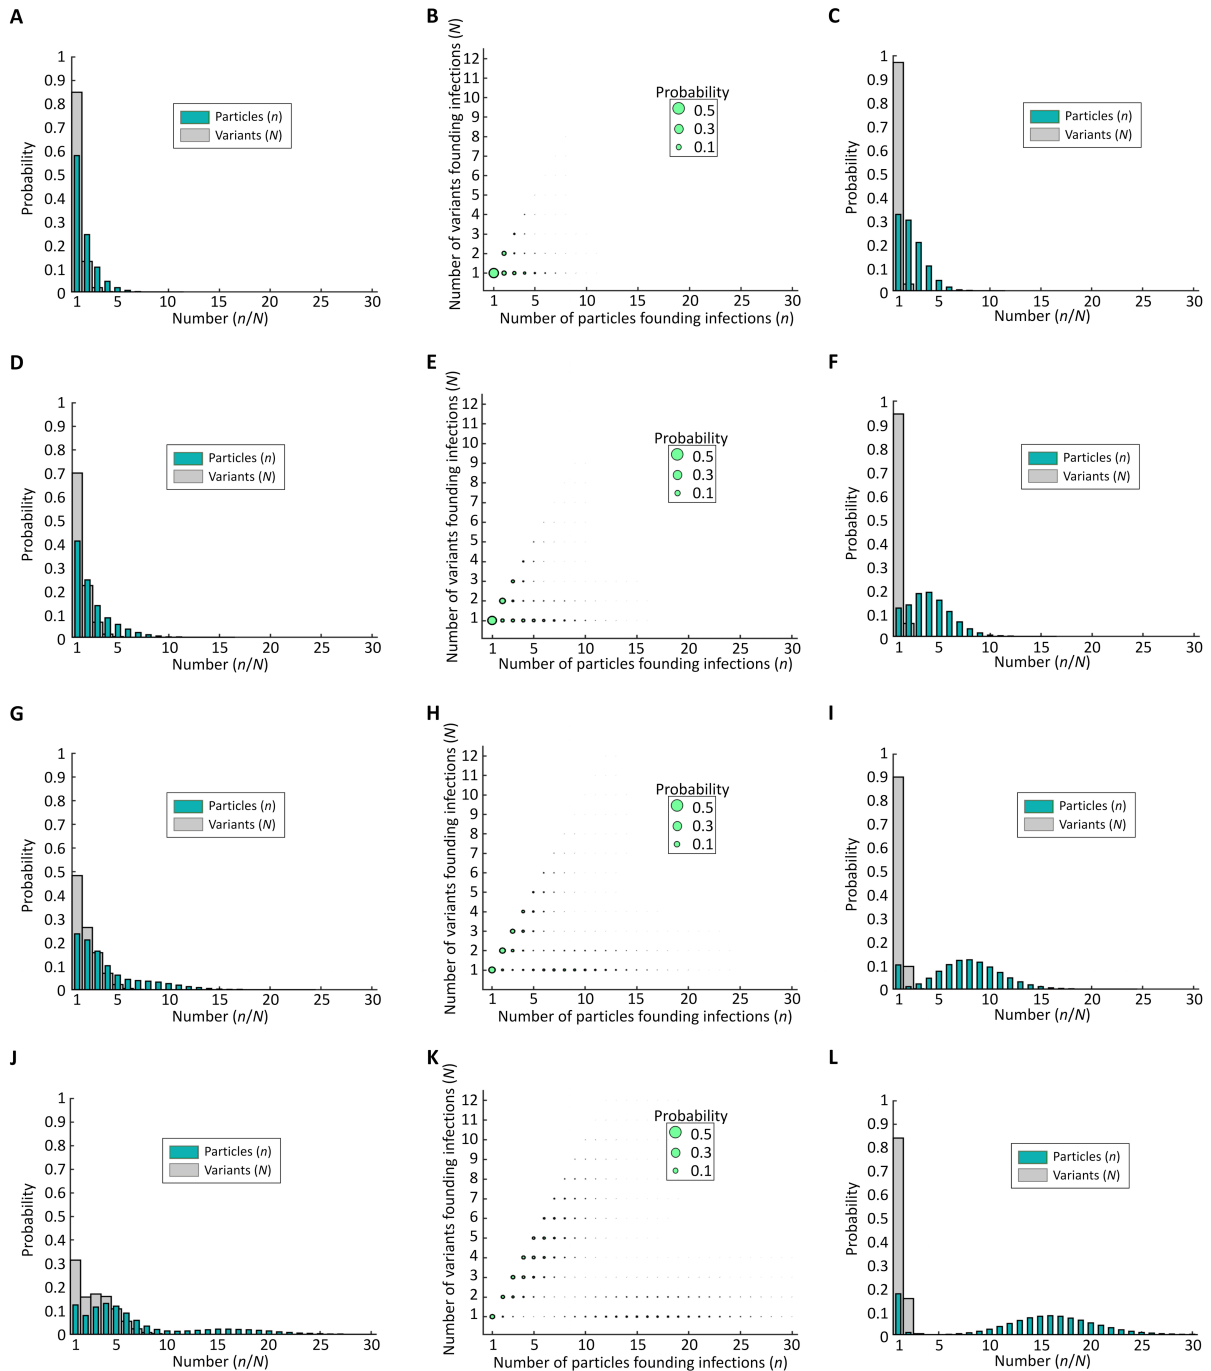

988

989 Figure S9. The distributions of the numbers of transmitted particles and variants for different values of the  
 990 per-particle transmission probability ( $p$ ). (A) The distributions of the numbers of particles (teal) and  
 991 numbers of distinct variants (grey) founding new infections when the standard value of  $p$  in the no  
 992 selection case is multiplied by factor 0.5. (B) The joint distribution of the numbers of particles and variants

993 founding new infections when the standard value of  $p$  in the no selection case is multiplied by factor 0.5.  
994 (C) The distributions of the numbers of particles (teal) and numbers of distinct variants (grey) founding  
995 new infections in the population when the standard value of  $p$  in the no selection case is multiplied by  
996 factor 0.5. (D)-(F), (G)-(I) and (J)-(L) are figures analogous to A-C for factors 1, 2 and 4 respectively. We  
997 note that, by varying  $p$ , we are also testing the robustness of our results to the assumption that 30% of  
998 new infections are founded by multiple variants. For example, in panel A, 14% of infections are founded  
999 by multiple variants. The parameter  $f$  characterising the proportion of the time that the environment is  
1000 appropriate for transmission could then be varied so that the per-act transmission probability is 0.003, but  
1001 this would not alter the results in panels A-C which are conditional on transmission occurring. Parameter  
1002 values: variant distribution parameter values are given in Table 1 of Text S1, and transmission parameter  
1003 values are the same as in the no selection case given in Table 2 of Text S1 but with  $p$  amended as  
1004 described above.

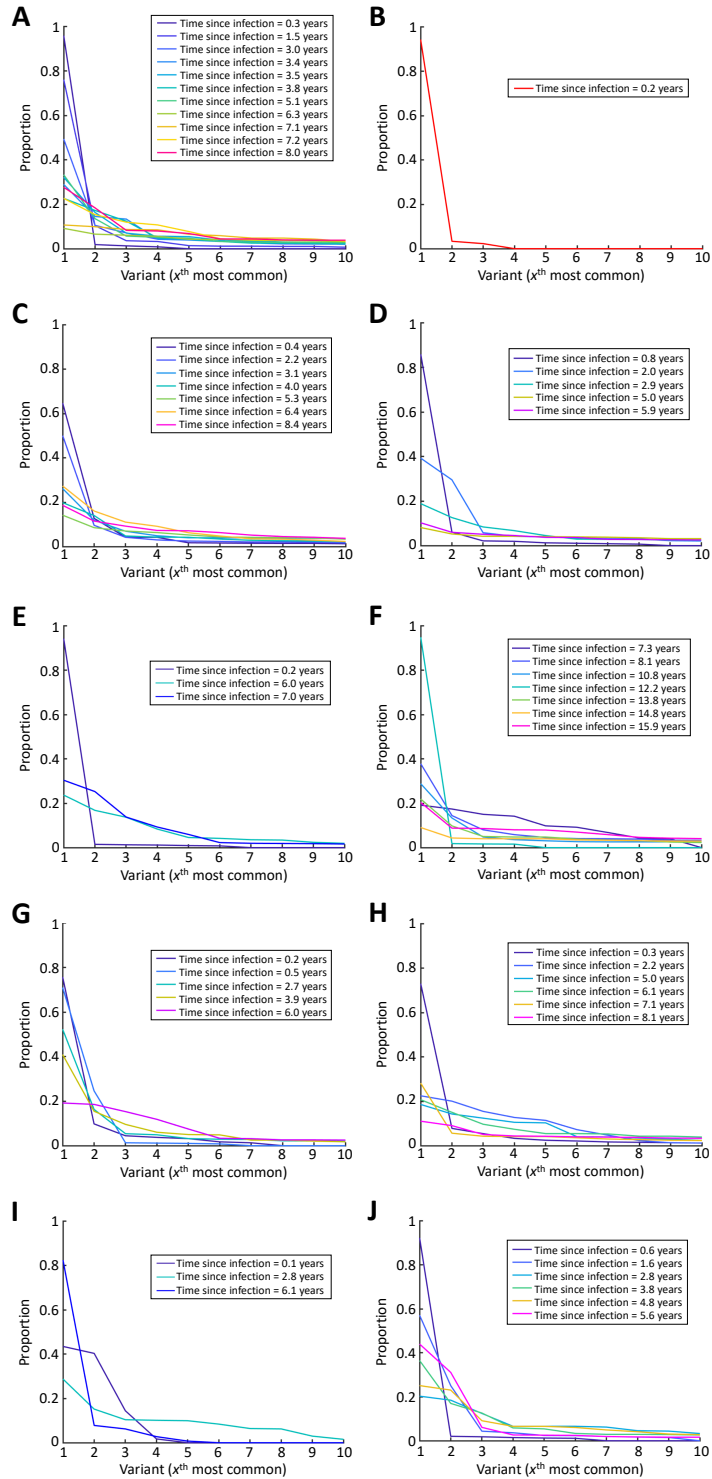

1005

1006 Figure S10. Data showing the distribution of variants in the ten infected individuals during the course of  
 1007 untreated infection. All data are for integrase. Each panel corresponds to a different individual, with each

1008 line representing a different time of sampling in that individual. The  $x^{\text{th}}$  most  
1009 common variant at the time of sampling. Note that the  $x^{\text{th}}$  most common variant at one time point does not  
1010 necessary correspond to the  $x^{\text{th}}$  most common variant at another time point. These data are obtained as  
1011 described in Materials and Methods.

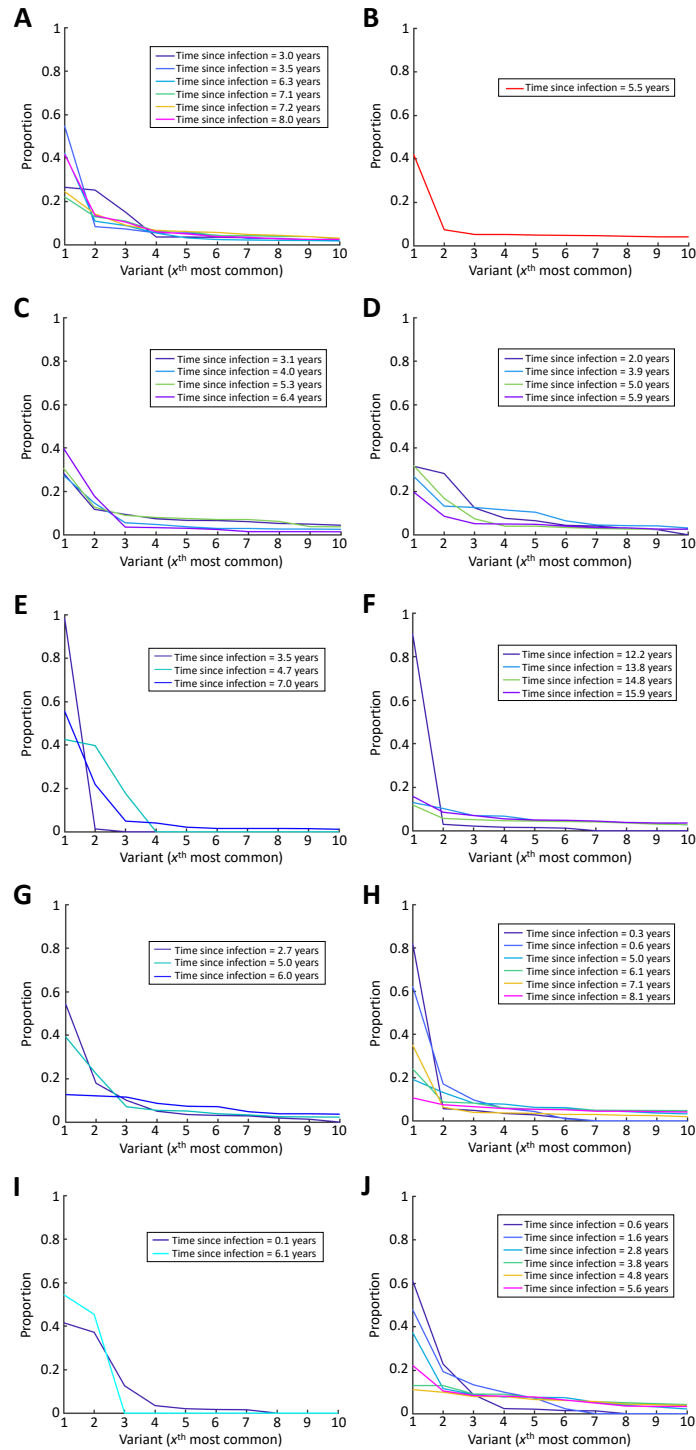

1012

1013 Figure S11. Data showing the distribution of variants in the ten infected individuals during the course of  
 1014 untreated infection. All data are for p24. Each panel corresponds to a different individual, with each line  
 1015 representing a different time of sampling in that individual. The x-axis represents the  $x^{\text{th}}$  most common



1016 variant at the time of sampling. Note that the  $x^{\text{th}}$  most common variant at one time point does not  
1017 necessary correspond to the  $x^{\text{th}}$  most common variant at another time point. These data are obtained as  
1018 described in Materials and Methods.

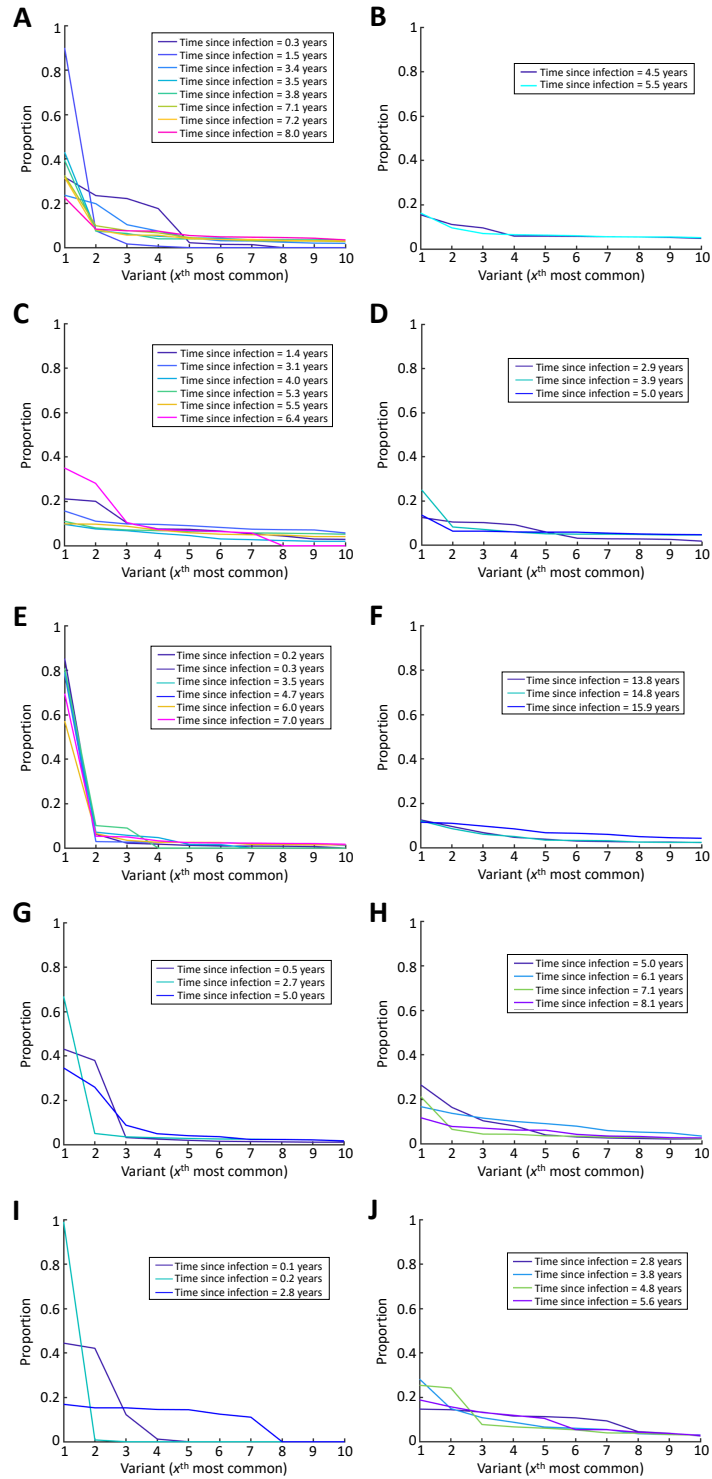

1019

1020 Figure S12. Data showing the distribution of variants in the ten individuals during the course of untreated

1021 infection. All data are for nef. Each panel corresponds to a different individual, with each line representing

1022 a different time of sampling in that individual. The  $x$ -axis represents the  $x^{\text{th}}$  most common variant at the  
1023 time of sampling. Note that the  $x^{\text{th}}$  most common variant at one time point does not necessary correspond  
1024 to the  $x^{\text{th}}$  most common variant at another time point. These data are obtained as described in Materials  
1025 and Methods.

1026

1027 **SUPPLEMENTARY TEXT**

1028 Text S1. Supporting Information.
